# Supplementary material
Source: PubMed Central journal article supplement (PMC7523284)
Supplement: Supplementary_Data.pdf [file Supplementary_Data.pdf]

Table SII. Adverse event characteristics in patients with regorafenib-induced hepatic toxicity.

| Patient no. | Baseline parameters CTCAE grade                    | Maximum CTCAE grade                                      | Pattern        |
|-------------|----------------------------------------------------|----------------------------------------------------------|----------------|
| 1           | ALT: 0, AST: 0, AP: 2, $\gamma$ -GT: 3,<br>Bili: 1 | ALT: 3, AST: 4, AP: 2, $\gamma$ -GT: 3,<br>Bili: 2       | Hepatocellular |
| 2           | ALT: 0, AST: 0, AP: 0, $\gamma$ -GT: 0,<br>Bili: 0 | ALT: 0, AST: 0, AP: n.a., $\gamma$ -GT: n.a.,<br>Bili: 1 | Cholestatic    |
| 3           | ALT: 1, AST: 1, AP: 2, $\gamma$ -GT: 3,<br>Bili: 2 | ALT: 1, AST: 1, AP: 2, $\gamma$ -GT: 3,<br>Bili: 3       | Mixed          |
| 4           | ALT: 0, AST: 1, AP: 0, $\gamma$ -GT: 0,<br>Bili: 0 | ALT: 4, AST: 4, AP: 1, $\gamma$ -GT: 3,<br>Bili: 3       | Mixed          |
| 5           | ALT: 0, AST: 0, AP: 0, $\gamma$ -GT: 0,<br>Bili: 0 | ALT: 2, AST: 2, AP: 1, $\gamma$ -GT: 3,<br>Bili: 3       | Mixed          |

CTCAE, Common Terminology Criteria of Adverse Events; ALT, alanine aminotransferase; AST, aspartate aminotransferase; AP, alkaline phosphatase;  $\gamma$ -GT,  $\gamma$ -glutamyltransferase; Bili, bilirubin; n.a., not available.
